# Supplementary material for: Ascidian-inspired aciduric hydrogels with high stretchability and adhesiveness promote gastric hemostasis and wound healing
Source: Royal Society of Chemistry journal article supplement (doi:10.1039/d2bm00183g), 2022-01-01
Supplement: d2bm00183g3.pdf [file d2bm00183g3.pdf]

## Supporting Information

Ascidian-Inspired Aciduric Hydrogels with High Stretchability and Adhesiveness  
Promote Gastric Hemostasis and Wound Healing

*Wenliang Xue*<sup>a</sup>, *Rong Yang*<sup>a</sup>, *Shuai Liu*<sup>c</sup>, *Yajie Pu*<sup>a</sup>, *Penghui Wang*<sup>a</sup>, *Wenjie Zhang*<sup>a</sup>, *Xiaoyan Tan*<sup>a,b</sup>, *Bo Chi*<sup>a,b,\*</sup>

<sup>a</sup> State Key Laboratory of Materials-Oriented Chemical Engineering, College of Food Science and Light Industry, Nanjing Tech University, Nanjing 211816, China.

<sup>b</sup> National Synergetic Innovation Center for Advanced Materials, Nanjing Tech University, Nanjing 211816, China.

<sup>c</sup> School of Chemical Engineering, Nanjing University of Science and Technology, Nanjing 210094, China.

\* Correspondence to:

**Bo Chi**, State Key Laboratory of Materials-Oriented Chemical Engineering, National Synergetic Innovation Center for Advanced Materials, Nanjing Tech University, Nanjing 211816, China. E-mail: [chibo@njtech.edu.cn](mailto:chibo@njtech.edu.cn).

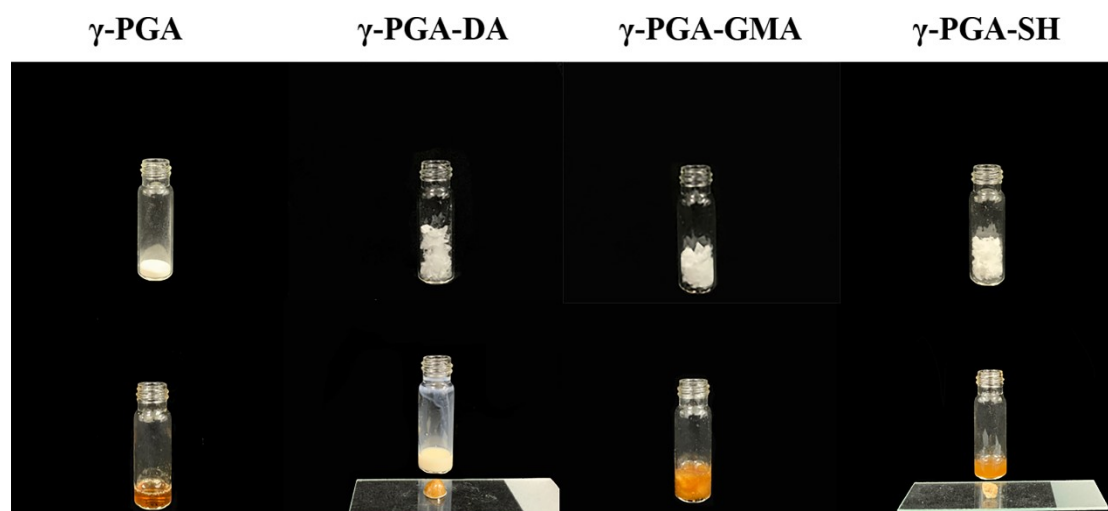

**Fig. S1.** Photographs of TA solution reacted with different lyophilized  $\gamma$ -PGA derivatives.

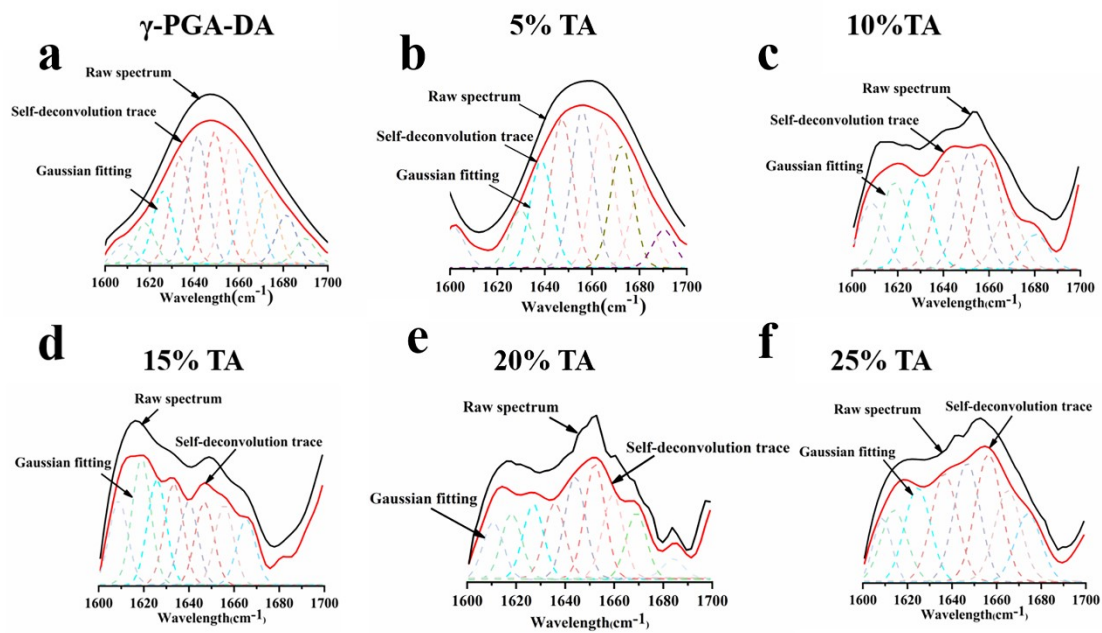

**Fig. S2.** Secondary structures analysis of  $\gamma$ -PGA-DA (a), PDTA formed by  $\gamma$ -PGA-DA and 5% TA (b), 10% TA (c), 15% TA (d), 20% TA (e), 25% TA (f).

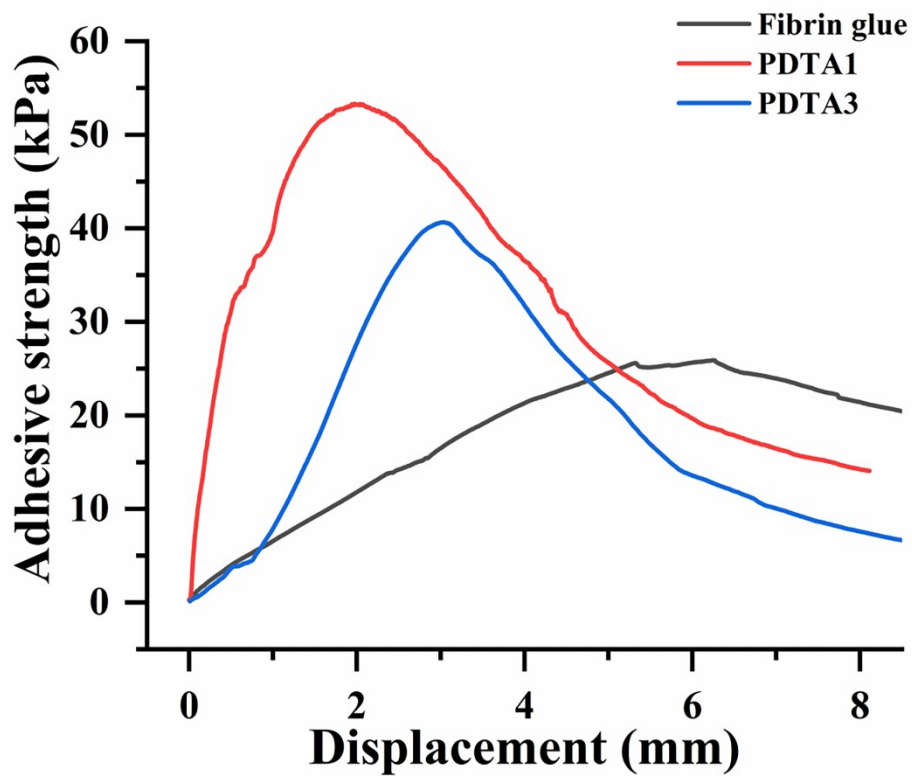

**Fig. S3.** The adhesion curves of fibrin glue, PDTA1 hydrogel adhesive and PDTA3 hydrogel adhesive.

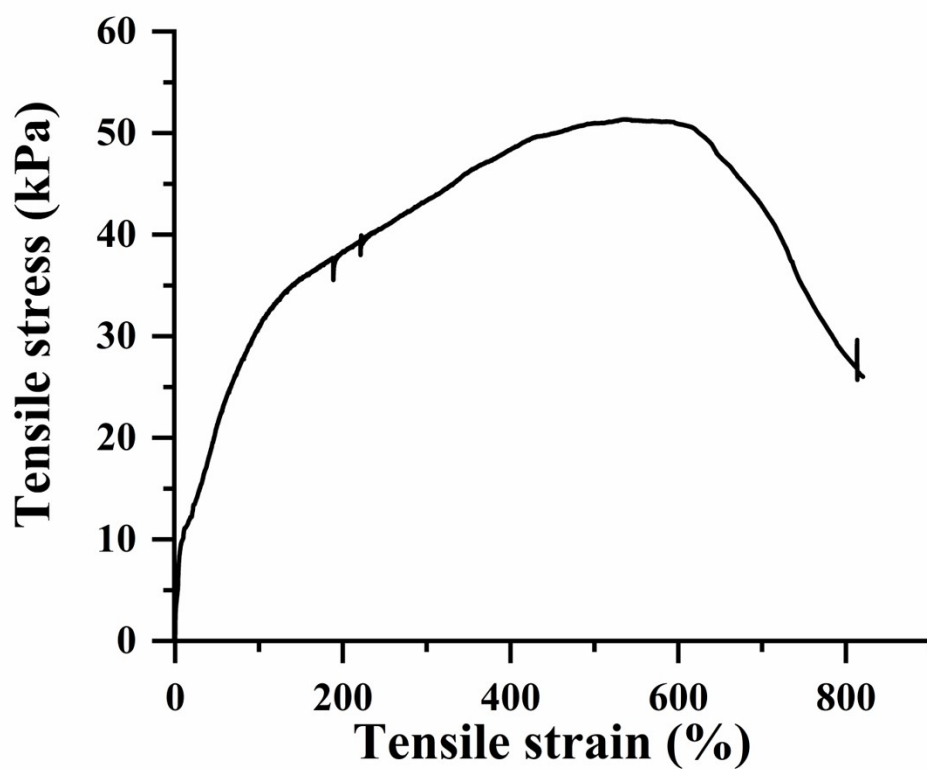

Fig. S4. The tensile stress-strain curves curve of PDTA1 hydrogel adhesive.

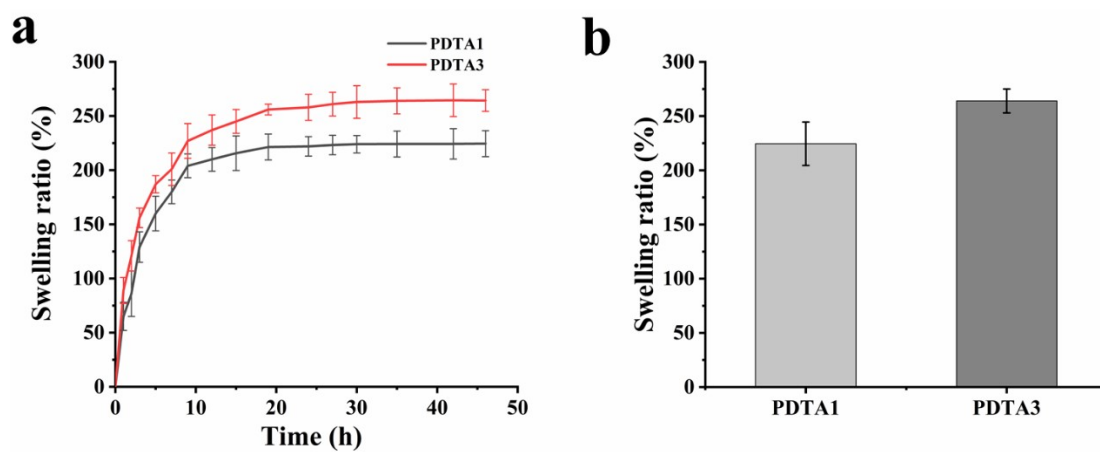

Fig. S5. The swelling property of PDTA hydrogel adhesives in stimulation gastric fluid.

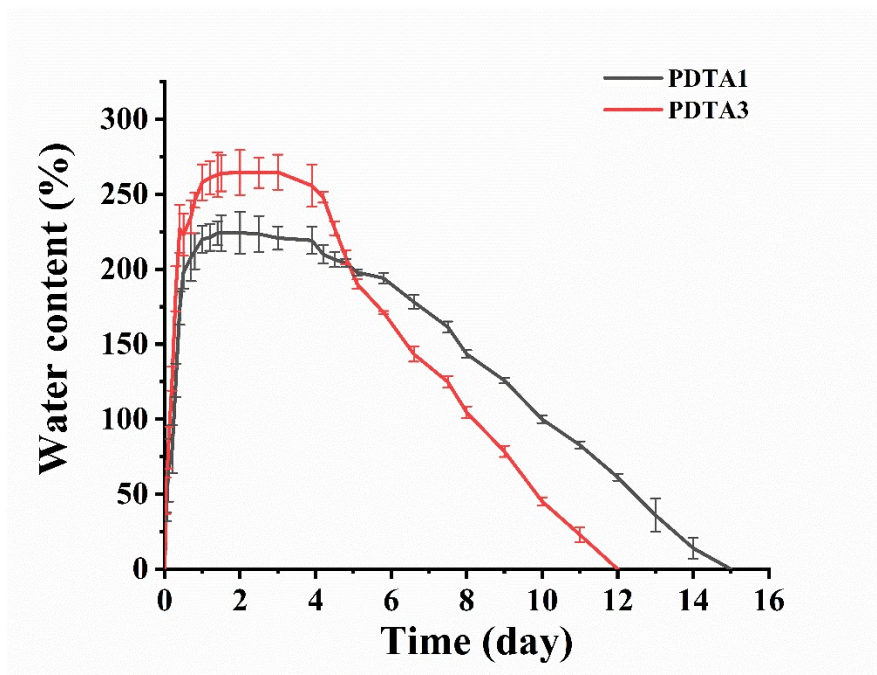

Fig. S6. The water content properties of hydrogel adhesives.

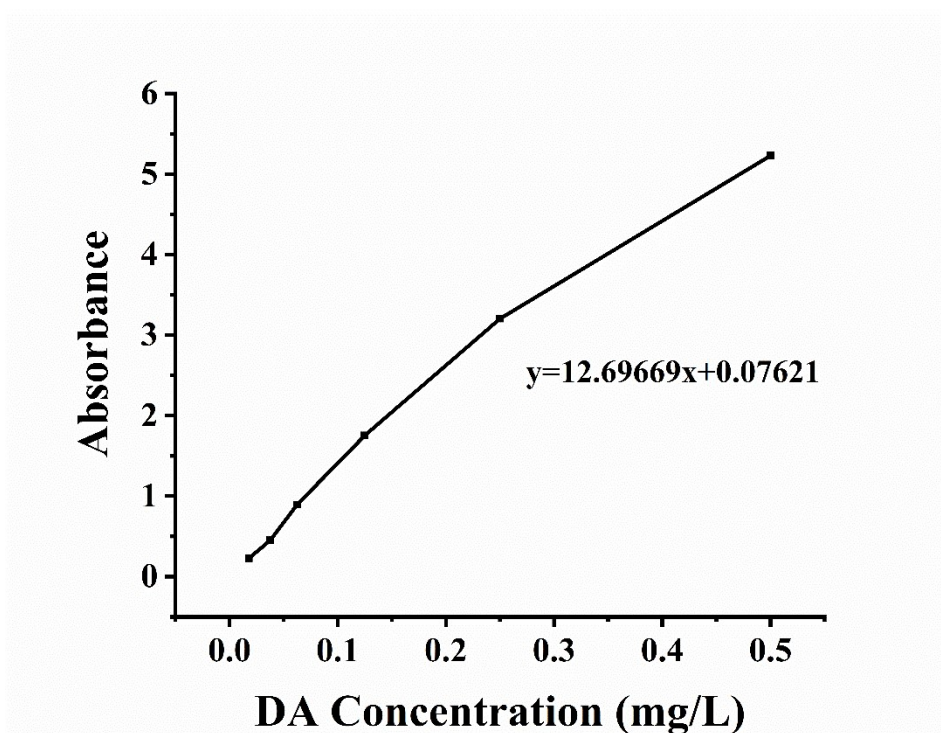

Fig. S7. The calibration curve of dopamine.

**Table S1.** Secondary structures analysis of  $\gamma$ -PGA,  $\gamma$ -PGA-DA and PDTA.

| Secondary structure fractions | $\gamma$ -PGA                          |          | $\gamma$ -PGA-DA     |          | PDTA                 |          |
|-------------------------------|----------------------------------------|----------|----------------------|----------|----------------------|----------|
|                               | Peak position [cm-1]                   | Area [%] | Peak position [cm-1] | Area [%] | Peak position [cm-1] | Area [%] |
| $\alpha$ -helix               | 1657;1649                              | 29.1     | 1649;1618;           | 28.3     | 1656;1616;           | 18.7     |
| $\beta$ -sheet                | 1617;1625;<br>1633;1673;<br>1681;1689. | 37.3     | 1633;1681            | 43.7     | 1626;1636            | 38.8     |
| $\beta$ -turn                 | 1665.0                                 | 16.6     | 1665                 | 28.0     | 1666;1676            | 14.2     |
| Random coil                   | 1641.5                                 | 14.6     | ×                    | 0        | 1646                 | 21.2     |
| Indetermination               | 1608.8                                 | 2.4      | ×                    | 0        | 1609                 | 7.1      |

**Table S2.** The secondary structure analyzes of PDTA formed with different concentrations of TA.

| Secondary structure fractions | 5% TA                |          | 10% TA               |          | 15% TA               |          | 20% TA               |          | 25%TA                |          |
|-------------------------------|----------------------|----------|----------------------|----------|----------------------|----------|----------------------|----------|----------------------|----------|
|                               | Peak position [cm-1] | Area [%] |
| $\alpha$ -helix               | 1657                 | 21.6     | 1651;1659            | 28.1     | 1655                 | 11.1     | 1652                 | 9.6      | 1656.3               | 8.3      |
| $\beta$ -sheet                | 1611;1621;1633       | 31.6     | 1618;1629            | 26.9     | 1618;1625;1633;1639  | 44.1     | 1616;1622;1637       | 45.4     | 1613;1624;1638       | 44.6     |
| $\beta$ -turn                 | 1668;1680;1687       | 26.0     | 1668;1680            | 15.5     | 1665                 | 14.8     | 1662;1670;1685       | 17.3     | 1665;1674            | 18.8     |
| Random coil                   | 1645                 | 20.8     | 1641                 | 18.4     | 1646                 | 22.8     | 1643                 | 18.6     | 1646                 | 15.3     |
| Indetermination               | ×                    | 0        | 1608                 | 11.1     | 1608                 | 7.2      | 1607                 | 8        | 1606                 | 13       |

**Movie S1.** The robust adhesion of PDTA1 on mental, speed  $\times 3$ .

**Movie S2.** High stretchability of PDTA1, speed  $\times 3$ .
